# Supplementary material for: Olig3 regulates early cerebellar development
Source: eLife. 2021 Feb 16;10:e64684. doi: 10.7554/eLife.64684 (PMC7886330; doi:10.7554/eLife.64684)
Supplement: Figure 1—figure supplement 2—source data 1. [file elife-64684-fig1-figsupp2-data1.xlsx]

## Sheet: 1C
					Proportion (Olig3+/BrdU+)/BrdU+
			Mouse #	E10.5	E11.5	E12.5	E13.5	E14.5
			WT1	0.98	0.96	0.91	0.68	0.12
			WT2	0.95	0.98	0.95	0.52	0.14
			WT3	0.98	0.95	0.92	0.64	0.08
			WT4	0.99	0.99	0.94	0.67	0.09
	Mean			0.975	0.97	0.93	0.6275	0.1075
	Std. Deviation			0.01732	0.01826	0.01826	0.07365	0.02754
	Std. Error of Mean			0.00866	0.009129	0.009129	0.03683	0.01377

## Sheet: 1D
					Proportion (Olig3+/BrdU+)/BrdU+
			Mouse #	E10.5	E11.5	E12.5	E13.5	E14.5
			WT1	0.38	0.33	0.36	0.18	0.08
			WT2	0.41	0.35	0.42	0.22	0.04
			WT3	0.36	0.34	0.32	0.19	0.04
			WT4	0.42	0.33	0.33	0.16	0.07
	Mean			0.3925	0.3375	0.3575	0.1875	0.0575
	Std. Deviation			0.02754	0.009574	0.045	0.025	0.02062
	Std. Error of Mean			0.01377	0.004787	0.0225	0.0125	0.01031
