# Supplementary material for: Olig3 regulates early cerebellar development
Source: eLife. 2021 Feb 16;10:e64684. doi: 10.7554/eLife.64684 (PMC7886330; doi:10.7554/eLife.64684)
Supplement: Figure 1—source data 1. [file elife-64684-fig1-data1.xlsx]

## Sheet: 1B Rhombic lip
					Olig3+ cells/section
			Mouse #	E10.5	E11.5	E12.5	E13.5	E14.5
			WT1	256.2	294.1	191.4	28.3	4.8
			WT2	287.4	334.8	184.5	26.1	8.1
			WT3	246.5	326.8	173.3	32	5.2
			WT4	269	304.3	195	24.2	5.1
	4.9			264.8	315	186.1	27.65	5.8
	Std. Deviation			17.68	19	9.551	3.349	1.543
	Std. Error of Mean			8.838	9.498	4.776	1.675	0.7714

## Sheet: 1B ventricular zone
					Olig3+ cells/section
			Mouse #	E10.5	E11.5	E12.5	E13.5	E14.5
			WT1	0	145.1	450.9	180.1	33.9
			WT2	0	169.1	521.6	193.3	45.4
			WT3	0	181.4	469.5	168.5	58.1
			WT4	0	162.9	445	171.1	42.6
	Mean			0	164.6	471.8	178.3	45
	Std. Deviation			0	15.12	34.83	11.2	10.01
	Std. Error of Mean			0	7.559	17.42	5.598	5.006

## Sheet: 1C Rhombic lip
					Proportion: (Olig3+/Sox2+)/Olig3+
			Mouse #	E10.5	E11.5	E12.5	E13.5	E14.5
			WT1	0.96	0.94	0.91	0.55	0.02
			WT2	0.95	0.98	0.95	0.52	0
			WT3	0.98	0.95	0.92	0.47	0
			WT4	0.95	0.94	0.94	0.52	0
	Mean			0.96	0.9525	0.93	0.515	0.005
	Std. Deviation			0.01414	0.01893	0.01826	0.03317	0.01
	Std. Error of Mean			0.007071	0.009465	0.009129	0.01658	0.005

## Sheet: 1C ventricular zone
					Proportion: (Olig3+/Sox2+)/Olig3+
			Mouse #	E10.5	E11.5	E12.5	E13.5	E14.5
			WT1	0	0.72	0.62	0.52	0.1
			WT2	0	0.68	0.62	0.48	0.09
			WT3	0	0.64	0.64	0.45	0.08
			WT4	0	0.69	0.61	0.46	0.01
	Mean			0	0.6825	0.6225	0.4775	0.07
	Std. Deviation			0	0.03304	0.01258	0.03096	0.04082
	Std. Error of Mean			0	0.01652	0.006292	0.01548	0.02041

## Sheet: 1D
					cells/section
					E10.5	E11.5	E12.5	E13.5	E14.5
			WT 1	Olig3+Atoh1-	214.5	221.2	131.3	12.9	0
			WT 2	Olig3+Atoh1-	189.6	246.3	118.2	5.9	0
			WT 3	Olig3+Atoh1-	179.4	231.9	106.7	4.9	0
			WT 4	Olig3+Atoh1-	212.1	242.9	122.9	6.1	0
	Mean				198.9	235.6	119.775	7.45	0
	Std. Deviation				17.17	11.38	10.264	3.671	0
	Std. Error of Mean				8.585	5.692	5.132	1.836	0
					E10.5	E11.5	E12.5	E13.5	E14.5
			WT 1	Olig3+Atoh1+	79	124.1	104.6	37.4	8.6
			WT 2	Olig3+Atoh1+	67.3	108.8	96.6	28.9	5.9
			WT 3	Olig3+Atoh1+	62.8	102.2	89.1	26.5	6.1
			WT 4	Olig3+Atoh1+	66.4	112.6	78.4	23.7	6.9
	Mean				68.88	111.9	92.18	29.13	6.875
	Std. Deviation				7.024	9.184	11.15	5.912	1.228
	Std. Error of Mean				3.512	4.592	5.576	2.956	0.6142
					E10.5	E11.5	E12.5	E13.5	E14.5
			WT 1	Olig3-Atoh1+	54.1	56.4	62.9	48.9	51.1
			WT 2	Olig3-Atoh1+	41.9	48.8	53	61.2	42.2
			WT 3	Olig3-Atoh1+	44.3	47.3	57	54.2	46.9
			WT 4	Olig3-Atoh1+	48.7	52.1	51.6	57.7	43.8
	Mean				47.25	51.15	56.13	55.5	46
	Std. Deviation				5.365	4.034	5.063	5.247	3.92
	Std. Error of Mean				2.683	2.017	2.532	2.623	1.96

## Sheet: 1E
					cells/section
					E10.5	E11.5	E12.5	E13.5	E14.5
			WT 1	Olig3+/Ptf1a-/Foxp2-	0	14.2	38.7	9.3	8.6
			WT 2	Olig3+/Ptf1a-/Foxp2-	0	10.8	35.5	10.7	8.9
			WT 3	Olig3+/Ptf1a-/Foxp2-	0	16.4	33.9	11.1	7.4
			WT 4	Olig3+/Ptf1a-/Foxp2-	0	12.6	34.7	10.9	7.2
	Mean				0	13.5	35.7	10.5	8.025
	Std. Deviation				0	2.38	2.104	0.8165	0.85
	Std. Error of Mean				0	1.19	1.052	0.4082	0.425
					E10.5	E11.5	E12.5	E13.5	E14.5
			WT 1	Olig3+/Ptf1a+/Foxp2-	0	81.9	267.6	75.6	8.6
			WT 2	Olig3+/Ptf1a+/Foxp2-	0	76.1	256.9	71.1	8.9
			WT 3	Olig3+/Ptf1a+/Foxp2-	0	74.5	248.9	68.9	7.4
			WT 4	Olig3+/Ptf1a+/Foxp2-	0	73	253.6	66.7	7.2
	Mean				0	76.38	256.8	70.58	8.025
	Std. Deviation				0	3.895	7.943	3.801	0.85
	Std. Error of Mean				0	1.947	3.972	1.901	0.425
					E10.5	E11.5	E12.5	E13.5	E14.5
			WT 1	Olig3+/Ptf1a-/Foxp2+	0	59.7	201.9	81.1	10.4
			WT 2	Olig3+/Ptf1a+/Foxp2-	0	63.9	189.2	77.5	8.6
			WT 3	Olig3+/Ptf1a+/Foxp2-	0	56.4	179.8	72.7	8.5
			WT 4	Olig3+/Ptf1a+/Foxp2-	0	57.2	192.3	76.8	9.4
	Mean				0	59.3	190.8	77.03	9.225
	Std. Deviation				0	3.373	9.111	3.444	0.8808
	Std. Error of Mean				0	1.687	4.555	1.722	0.4404
