# Supplementary material for: Olig3 regulates early cerebellar development
Source: eLife. 2021 Feb 16;10:e64684. doi: 10.7554/eLife.64684 (PMC7886330; doi:10.7554/eLife.64684)
Supplement: Figure 2—figure supplement 1—source data 1. [file elife-64684-fig2-figsupp1-data1.xlsx]

## Sheet: 1C
			Mouse #	E10.5	E11.5	E12.5	E13.5
			Olig3creERT;MaptnLacZ_1	2436.9	2198.9	1324.7	332.1
			Olig3creERT;MaptnLacZ_2	2329.4	2094.3	1086.9	425.2
			Olig3creERT;MaptnLacZ_3	2547.4	2122.5	1091.8	368.1
	Mean			2438	2139	1168	375.1
	Std. Deviation			109	54.12	135.9	46.95
	Std. Error of Mean			62.93	31.25	78.46	27.1

## Sheet: 1D
					Proportion (bgal+/Brn2+)/Brn2+
			Mouse #	E10.5	E11.5	E12.5	E13.5
			Olig3creERT;MaptnLacZ_1	0.4	0.25	0.27	0.081
			Olig3creERT;MaptnLacZ_2	0.41	0.22	0.27	0.028
			Olig3creERT;MaptnLacZ_3	0.39	0.28	0.23	0.024
	Mean			0.4	0.25	0.2567	0.04433
	Std. Deviation			0.01	0.03	0.02309	0.03182
	Std. Error of Mean			0.005774	0.01732	0.01333	0.01837

## Sheet: 1E
					Proportion (bgal+/Tbr2+)/Tbr2+
			Mouse #	E10.5	E11.5	E12.5	E13.5
			Olig3creERT;MaptnLacZ_1	0.38	0.33	0.12	0.08
			Olig3creERT;MaptnLacZ_2	0.36	0.34	0.11	0.02
			Olig3creERT;MaptnLacZ_3	0.32	0.3	0.16	0.06
	Mean			0.3533	0.3233	0.13	0.05333
	Std. Deviation			0.03055	0.02082	0.02646	0.03055
	Std. Error of Mean			0.01764	0.01202	0.01528	0.01764
