# Supplementary material for: Olig3 regulates early cerebellar development
Source: eLife. 2021 Feb 16;10:e64684. doi: 10.7554/eLife.64684 (PMC7886330; doi:10.7554/eLife.64684)
Supplement: Figure 2—source data 1. [file elife-64684-fig2-data1.xlsx]

## Sheet: 2E
				Proportion: (bgal+/Pax6+)/Pax6+
			Mouse #	E10.5	E11.5	E12.5	E13.5
			Olig3creErt2;MaptnlacZ 1	0.65	0.58	0.37	0.34
			Olig3creErt2;MaptnlacZ 2	0.59	0.55	0.35	0.27
			Olig3creErt2;MaptnlacZ 3	0.61	0.59	0.31	0.35
	Mean			0.6167	0.5733	0.3433	0.32
	Std. Deviation			0.03055	0.02082	0.03055	0.04359
	Std. Error of Mean			0.01764	0.01202	0.01764	0.02517

## Sheet: 2F
				Proportion: (bgal+/Tbr1+)/Tbr1+
			Mouse #	E10.5	E11.5	E12.5	E13.5
			Olig3creErt2;MaptnlacZ 1	0.99	0.91	0.38	0.017
			Olig3creErt2;MaptnlacZ 2	0.97	0.95	0.68	0.032
			Olig3creErt2;MaptnlacZ 3	0.98	0.96	0.46	0.034
	Mean			0.98	0.94	0.5067	0.02767
	Std. Deviation			0.01	0.02646	0.1553	0.009292
	Std. Error of Mean			0.005774	0.01528	0.08969	0.005364

## Sheet: 2G
				Proportion: (bgal+/Foxp2+)/Foxp2+
			Mouse #	E10.5	E11.5	E12.5	E13.5
			Olig3creErt2;MaptnlacZ 1	0.52	0.46	0.17	0.12
			Olig3creErt2;MaptnlacZ 2	0.48	0.44	0.23	0.14
			Olig3creErt2;MaptnlacZ 3	0.54	0.44	0.26	0.13
	Mean			0.5133	0.4467	0.22	0.13
	Std. Deviation			0.03055	0.01155	0.04583	0.01
	Std. Error of Mean			0.01764	0.006667	0.02646	0.005774

## Sheet: 2H
				Proportion: (bgal+/Pax2+)/Pax2+
			Mouse #	E10.5	E11.5	E12.5	E13.5
			Olig3creErt2;MaptnlacZ 1	0.06	0.028	0.01	0.011
			Olig3creErt2;MaptnlacZ 2	0.07	0.031	0.02	0.021
			Olig3creErt2;MaptnlacZ 3	0.04	0.039	0.017	0.019
	Mean			0.05667	0.03267	0.01567	0.017
	Std. Deviation			0.01528	0.005686	0.005132	0.005292
	Std. Error of Mean			0.008819	0.003283	0.002963	0.003055
