# Supplementary material for: Olig3 regulates early cerebellar development
Source: eLife. 2021 Feb 16;10:e64684. doi: 10.7554/eLife.64684 (PMC7886330; doi:10.7554/eLife.64684)
Supplement: Figure 3—figure supplement 1—source data 1. [file elife-64684-fig3-figsupp1-data1.xlsx]

## Sheet: 1A
	section
		Olig3+/- Average	Olig3-/- Average	Control SEM	Mutant SEM	Olig3+/- Upper	Olig3+/- Lower	Olig3-/- Upper	Olig3-/- Lower
	1	13696880	11269800	984936	131915	1.46818e+07	1.27119e+07	1.14017e+07	1.11379e+07
	2	13844880	10507110	1.28344e+06	813238	1.51283e+07	1.25614e+07	1.13203e+07	9.69387e+06
	3	13097310	9920220	1.60207e+06	267056	1.46994e+07	1.14952e+07	1.01873e+07	9.65316e+06
	4	12006940	9098930	1.21151e+06	589724	1.32184e+07	1.07954e+07	9.68865e+06	8.50921e+06
	5	11423220	8465980	1.08816e+06	686281	1.25114e+07	1.03351e+07	9.15226e+06	7.7797e+06
	6	10715690	7990780	1.63459e+06	650415	1.23503e+07	9.0811e+06	8.6412e+06	7.34036e+06
	7	9518110	7380300	772120	590797	1.02902e+07	8.74599e+06	7.9711e+06	6.7895e+06
	8	10522340	6861510	1.6502e+06	570292	1.21725e+07	8.87214e+06	7.4318e+06	6.29122e+06
	9	10000920	6785950	1.06638e+06	347045	1.10673e+07	8.93454e+06	7.13299e+06	6.43891e+06
	10	10394580	6469450	1.5263e+06	250610	1.19209e+07	8.86828e+06	6.72006e+06	6.21884e+06
	11	10840590	6026510	1.65317e+06	452918	1.24938e+07	9.18742e+06	6.47943e+06	5.57359e+06
	12	9560100	5701090	779444	315493	1.03395e+07	8.78066e+06	6.01658e+06	5.3856e+06
	13	9825910	5430330	1.01615e+06	342569	1.08421e+07	8.80976e+06	5.7729e+06	5.08776e+06
	14	9586220	5344990	1.02892e+06	335917	1.06151e+07	8.5573e+06	5.68091e+06	5.00907e+06
	15	9954760	5316870	1.07864e+06	528405	1.10334e+07	8.87612e+06	5.84528e+06	4.78846e+06
	16	9561640	5159240	1.05235e+06	493945	1.0614e+07	8.50929e+06	5.65319e+06	4.66529e+06
	17	9334000	4973280	888020	374857	1.0222e+07	8.44598e+06	5.34814e+06	4.59842e+06
	18	9369030	5036400	1.36017e+06	331593	1.07292e+07	8.00886e+06	5.36799e+06	4.70481e+06
	19	9459600	5142610	1.05582e+06	375345	1.05154e+07	8.40378e+06	5.51796e+06	4.76726e+06
	20	9159670	5247030	815111	352548	9.97478e+06	8.34456e+06	5.59958e+06	4.89448e+06
	21	9533910	5147740	1.0799e+06	218634	1.06138e+07	8.45401e+06	5.36637e+06	4.92911e+06
	22	9968290	5550070	1.12489e+06	532228	1.10932e+07	8.8434e+06	6.0823e+06	5.01784e+06
	23	10210150	5950630	854954	652885	1.10651e+07	9.3552e+06	6.60351e+06	5.29775e+06
	24	10557870	6596210	1.49575e+06	610388	1.20536e+07	9.06212e+06	7.2066e+06	5.98582e+06
	25	10138740	6821970	1.09002e+06	548478	1.12288e+07	9.04872e+06	7.37045e+06	6.27349e+06
	26	10859510	7187070	1.5375e+06	704854	1.2397e+07	9.32201e+06	7.89192e+06	6.48222e+06
	27	10335680	7671510	1.5898e+06	448931	1.19255e+07	8.74588e+06	8.12044e+06	7.22258e+06
	28	10467570	8692410	1.41302e+06	1.37544e+06	1.18806e+07	9.05455e+06	1.00678e+07	7.31697e+06
	29	12437150	8480210	1.24074e+06	657877	1.36779e+07	1.11964e+07	9.13809e+06	7.82233e+06
	30	11483290	8643120	1.12774e+06	530464	1.2611e+07	1.03555e+07	9.17358e+06	8.11266e+06
	31	12507480	9477680	1.3594e+06	301397	1.38669e+07	1.11481e+07	9.77908e+06	9.17628e+06
	32	13183510	10241250	1.68786e+06	71316.4	1.48714e+07	1.14956e+07	1.03126e+07	1.01699e+07
	33	12241560	10960830	1.24764e+06	63450	1.34892e+07	1.09939e+07	11024280	10897380

## Sheet: 1B
				cells/section	cells/section
				Brn2	Brn2
				Control	Olig3 KO
			mouse # 1	354.9	267.5
			mouse # 2	314.4	220.1
			mouse # 3	372.4	214.3
	Mean			347.2	234
	Std. Deviation			29.75	29.19
	Std. Error of Mean			17.18	16.85

## Sheet: 1C
				cells/section	cells/section
				Tbr2	Tbr2
				Control	Olig3 KO
			mouse # 1	386.6	331.6
			mouse # 2	368.3	326.4
			mouse # 3	329.3	354.9
	Mean			361.4	337.6
	Std. Deviation			29.27	15.18
	Std. Error of Mean			16.9	8.763
