# Supplementary material for: Olig3 regulates early cerebellar development
Source: eLife. 2021 Feb 16;10:e64684. doi: 10.7554/eLife.64684 (PMC7886330; doi:10.7554/eLife.64684)
Supplement: Figure 3—figure supplement 2—source data 1. [file elife-64684-fig3-figsupp2-data1.xlsx]

## Sheet: 2A
				cells/section	cells/section
				Tbr1	Tbr1
				Control	Olig3 KO
			mouse # 1	132.5	34.6
			mouse # 2	146.9	46.6
			mouse # 3	134.1	42.1
	Mean			137.8	41.1
	Std. Deviation			7.893	6.062
	Std. Error of Mean			4.557	3.5

## Sheet: 2B
				cells/section	cells/section
				Pax6	Pax6
				Control	Olig3 KO
			mouse # 1	186.1	98.3
			mouse # 2	191.1	102.4
			mouse # 3	178.6	90.5
	Mean			185.3	97.07
	Std. Deviation			6.292	6.045
	Std. Error of Mean			3.632	3.49

## Sheet: 2C
				cells/section	cells/section
				Foxp2	Foxp2
				Control	Olig3 KO
			mouse # 1	886.7	832.6
			mouse # 2	986.5	848.4
			mouse # 3	874.4	789.1
	Mean			915.9	823.4
	Std. Deviation			61.48	30.71
	Std. Error of Mean			35.49	17.73
