# Supplementary material for: Olig3 regulates early cerebellar development
Source: eLife. 2021 Feb 16;10:e64684. doi: 10.7554/eLife.64684 (PMC7886330; doi:10.7554/eLife.64684)
Supplement: Figure 3—figure supplement 3—source data 1. [file elife-64684-fig3-figsupp3-data1.xlsx]

## Sheet: 3A
				Atoh1+ cells/section
				E11.5	E11.5	E12.5	E12.5
				Control	Olig3 KO	Control	Olig3 KO
			Mouse #1	162.2	128.4	118.6	44.5
			Mouse #2	168.1	116.1	124.6	52.2
			Mouse #3	172.3	123.7	108.6	68.2
			Mouse #4	176.3	118.6	112.4	65.6
	Mean			169.7	121.7	116.1	57.63
	Std. Deviation			6.031	5.473	7.034	11.21
	Std. Error of Mean			3.016	2.736	3.517	5.606

## Sheet: 3B
				Ptf1a+ cells/section
				E11.5	E11.5	E12.5	E12.5
				Control	Olig3 KO	Control	Olig3 KO
			Mouse #1	181.1	191.9	412.4	394.9
			Mouse #2	161.2	171.4	374.1	327.5
			Mouse #3	173.1	176.6	376.1	391.1
			Mouse #4		179.4	368.4	389.2
	Mean			171.8	179.8	382.8	375.7
	Std. Deviation			10.01	8.706	20.03	32.2
	Std. Error of Mean			5.781	4.353	10.02	16.1

## Sheet: 3C
				BrdU+ cells/section
				E11.5	E11.5	E12.5	E12.5
				Control	Olig3 KO	Control	Olig3 KO
			Mouse #1	136.9	108	53.4	32.4
			Mouse #2	128.1	101.7	48.4	28.3
			Mouse #3	145.2	112.2	56.5	36.3
			Mouse #4		114.2		39.3
	Mean			136.7	109	52.77	34.08
	Std. Deviation			8.551	5.525	4.087	4.775
	Std. Error of Mean			4.937	2.762	2.36	2.388

## Sheet: 3D
				BrdU+ cells/section
				E11.5	E11.5	E12.5	E12.5
				Control	Olig3 KO	Control	Olig3 KO
			Mouse #1	380.1	386.4	121.3	112.5
			Mouse #2	345.9	398.2	94	101.4
			Mouse #3	410.9	410.3	96	99.3
			Mouse #4	396.2	321.1	108.5	114.6
	Mean			383.3	379	105	107
	Std. Deviation			27.91	39.81	12.65	7.717
	Std. Error of Mean			13.96	19.91	6.324	3.858

## Sheet: 3E
				Tunel+ puncta/section
				E11.5	E11.5	E12.5	E12.5
				Control	Olig3 KO	Control	Olig3 KO
			Mouse #1	18.7	16.9	16.3	19
			Mouse #2	16.4	18.2	15.7	18.2
			Mouse #3	15.3	17.2	19.1	18.6
			Mouse #4	16.1	16.9	16.2	17.8
	Mean			16.63	17.3	16.83	18.4
	Std. Deviation			1.459	0.6164	1.539	0.5164
	Std. Error of Mean			0.7296	0.3082	0.7696	0.2582
