# Supplementary material for: Olig3 regulates early cerebellar development
Source: eLife. 2021 Feb 16;10:e64684. doi: 10.7554/eLife.64684 (PMC7886330; doi:10.7554/eLife.64684)
Supplement: Figure 3—source data 1. [file elife-64684-fig3-data1.xlsx]

## Sheet: 3A
				Volume	Volume
				(mm3)	(mm3)
				Control	Olig3 KO
			mouse # 1	1.32	0.68
			mouse # 2	1.23	0.64
			mouse # 3	1.2	0.61
			mouse # 4	1.15	0.64
	Mean			1.225	0.6425
	Std. Deviation			0.07141	0.02872
	Std. Error of Mean			0.03571	0.01436

## Sheet: 3B
				Area	Area
				(mm2)	(mm2)
				Control	Olig3 KO
			mouse # 1	0.434120	0.230197
			mouse # 2	0.413011	0.256230
			mouse # 3	0.340480	0.253884
			mouse # 4	0.380480	0.214246
	Mean			0.392	0.2386
	Std. Deviation			0.04084	0.02007
	Std. Error of Mean			0.02042	0.01003

## Sheet: 3C
				cells/section	cells/section
				Tbr1	Tbr1
				Control	Olig3 KO
			mouse # 1	172.4	38.7
			mouse # 2	166.2	41.4
			mouse # 3	194.2	66.6
	Mean			177.6	48.9
	Std. Deviation			14.71	15.39
	Std. Error of Mean			8.491	8.884

## Sheet: 3D
				cells/section	cells/section
				Pax6	Pax6
				Control	Olig3 KO
			mouse # 1	1741.8	938.3
			mouse # 2	1866.5	841.1
			mouse # 3	1941.1	966.6
	Mean			1850	915.3
	Std. Deviation			100.7	65.83
	Std. Error of Mean			58.14	38.01

## Sheet: 3E
				cells/section	cells/section
				Foxp2	Foxp2
				Control	Olig3 KO
			mouse # 1	1119.4	541.5
			mouse # 2	1202.2	641.6
			mouse # 3	1171.3	507.6
			mouse # 4	1143.4	511.5
	Mean			1159	550.6
	Std. Deviation			35.73	62.56
	Std. Error of Mean			17.86	31.28

## Sheet: 3F
				cells/section	cells/section
				Pax2	Pax2
				Control	Olig3 KO
			mouse # 1	628.4	879.4
			mouse # 2	576.5	965.5
			mouse # 3	574.3	852.2
			mouse # 4	591.1	898.6
	Mean			592.6	898.9
	Std. Deviation			25.02	48.29
	Std. Error of Mean			12.51	24.15
