# Supplementary material for: Olig3 regulates early cerebellar development
Source: eLife. 2021 Feb 16;10:e64684. doi: 10.7554/eLife.64684 (PMC7886330; doi:10.7554/eLife.64684)
Supplement: Figure 4—figure supplement 2—source data 1. [file elife-64684-fig4-figsupp2-data1.xlsx]

## Sheet: 2B
					Proportion: (Foxp2+/Pax2+)/Pax2+
				Control	Olig3 KO	Control	Olig3 KO	Control	Olig3 KO
				E13.5	E13.5	E14.5	E14.5	P0	P0
			mouse # 1	0.081	0.88	0.087	0.45	0.028	0.012
			mouse # 2	0.061	0.94	0.074	0.52	0.018	0.024
			mouse # 3	0.059	0.92	0.076	0.42	0.016	0.028
			mouse # 4	0.058	0.93	0.081	0.401	0.021	0.021
	Mean			0.06475	0.9175	0.0795	0.4478	0.02075	0.02125
	Std. Deviation			0.0109	0.0263	0.005802	0.05222	0.005252	0.006801
	Std. Error of Mean			0.005452	0.01315	0.002901	0.02611	0.002626	0.0034
