# Supplementary material for: Olig3 regulates early cerebellar development
Source: eLife. 2021 Feb 16;10:e64684. doi: 10.7554/eLife.64684 (PMC7886330; doi:10.7554/eLife.64684)
Supplement: Figure 4—source data 1. [file elife-64684-fig4-data1.xlsx]

## Sheet: 4D
					Pax2+ cells/section
				Control	Olig3 KO	Control	Olig3 KO	Control	Olig3 KO
				E13.5	E13.5	E14.5	E14.5	P0	P0
			mouse # 1	56.9	281.8	221.1	504.4	628.7	879.2
			mouse # 2	63.4	298.5	239.3	556.5	576.6	965.5
			mouse # 3	69	325	244.6	498.5	574.1	852.6
			mouse # 4	58.7	326.9	229.4	512.3	591.9	898.1
	Mean			62	308.1	233.6	517.9	592.8	898.9
	Std. Deviation			5.412	21.78	10.45	26.33	25.18	48.19
	Std. Error of Mean			2.706	10.89	5.223	13.17	12.59	24.1

## Sheet: 4E
					Proportion: (Foxp2+/Pax2+)/Foxp2+
				Control	Olig3 KO	Control	Olig3 KO	Control	Olig3 KO
				E13.5	E13.5	E14.5	E14.5	P0	P0
			mouse # 1	0.0245	0.49	0.042	0.31	0.028	0.022
			mouse # 2	0.032	0.52	0.031	0.28	0.011	0.029
			mouse # 3	0.028	0.47	0.035	0.26	0.014	0.031
			mouse # 4	0.029	0.56	0.037	0.31	0.018	0.016
	Mean			0.02838	0.51	0.03625	0.29	0.01775	0.0245
	Std. Deviation			0.003092	0.03916	0.004573	0.02449	0.007411	0.006856
	Std. Error of Mean			0.001546	0.01958	0.002287	0.01225	0.003705	0.003428

## Sheet: 4F
				Proportion: (Pax2+/bgal+)/Pax2+
				Control	Olig3 KO
			mouse # 1	0.062	0.266
			mouse # 2	0.07	0.261
			mouse # 3	0.046	0.259
			mouse # 4	0.042
	Mean			0.055	0.262
	Std. Deviation			0.01322	0.003606
	Std. Error of Mean			0.006608	0.002082
