# Supplementary material for: Olig3 regulates early cerebellar development
Source: eLife. 2021 Feb 16;10:e64684. doi: 10.7554/eLife.64684 (PMC7886330; doi:10.7554/eLife.64684)
Supplement: Figure 5—figure supplement 1—source data 1. [file elife-64684-fig5-figsupp1-data1.xlsx]

## Sheet: 1A
				proportion (Parvalbumin+/Foxp2+)/Parvalbumin+
			WT1	0.0082
			WT2	0.0084
			WT3	0.0072
	Mean			0.007933
	Std. Deviation			0.0006429
	Std. Error of Mean			0.0003712

## Sheet: 1B
				Control	Pax2
				electroporation	electroporation
			embryo 1	0.03	0.3
			embryo 2	0.04	0.32
			embryo 3	0.045	0.34
	Mean			0.03833	0.32
	Std. Deviation			0.007638	0.02
	Std. Error of Mean			0.00441	0.01155
