# Supplementary material for: Olig3 regulates early cerebellar development
Source: eLife. 2021 Feb 16;10:e64684. doi: 10.7554/eLife.64684 (PMC7886330; doi:10.7554/eLife.64684)
Supplement: Figure 5—source data 1. [file elife-64684-fig5-data1.xlsx]

## Sheet: 5B
				proportion (Foxp2+/GFP+)/GFP+
				Control	Pax2
				Electroporation	electroporation
				Control	Olig3 KO
			Embryo 1	0.72	0
			Embryo 2	0.68	0
			Embryo 3	0.74	0
			Embryo 4		0
			Embryo 5		0
			Embryo 6		0
			Embryo 7		0
	Mean			0.7133	0
	Std. Deviation			0.03055	0
	Std. Error of Mean			0.01764	0

## Sheet: 5C
				proportion (Pax2+/GFP+)/GFP+
				Control	Olig3
				Electroporation	electroporation
				Control	Olig3 KO
			embryo 1	0.48	0
			embryo 2	0.52	0
			embryo 3	0.42	0
			embryo 4	0.56	0.08
			embryo 5	0.49	0.12
	Mean			0.494	0.04
	Std. Deviation			0.05177	0.05657
	Std. Error of Mean			0.02315	0.0253
