# Supplementary material for: Olig3 regulates early cerebellar development
Source: eLife. 2021 Feb 16;10:e64684. doi: 10.7554/eLife.64684 (PMC7886330; doi:10.7554/eLife.64684)
Supplement: Figure 6—figure supplement 1—source data 1. [file elife-64684-fig6-figsupp1-data1.xlsx]

## Sheet: 1A
				cells/section	cells/section
				Foxp2	Foxp2
				Control	Olig2 KO
			mouse # 1	1136.9	750.2
			mouse # 2	1169.3	746.2
			mouse # 3	1098.1	821.3
			mouse # 4		798.1
	Mean			1135	779
	Std. Deviation			35.65	36.78
	Std. Error of Mean			20.58	18.39

## Sheet: 1B
				cells/section	cells/section
				Pax2	Pax2
				Control	Olig2 KO
			mouse # 1	609.1	761.4
			mouse # 2	589.5	792.4
			mouse # 3	572.5	735.3
			mouse # 4		749.2
	Mean			590.4	759.6
	Std. Deviation			18.32	24.34
	Std. Error of Mean			10.57	12.17

## Sheet: 1C upper
				proportion: (Foxp2+/bgal+)/Foxp2+
			Olig2cre;MaptnLacZ #1	0.484
			Olig2cre;MaptnLacZ #2	0.461
			Olig2cre;MaptnLacZ #3	0.526
			Olig2cre;MaptnLacZ #4	0.469
	Mean			0.485
	Std. Deviation			0.02895
	Std. Error of Mean			0.01447

## Sheet: 1C lower
				proportion: (Pax2+/bgal+)/Pax2+
			Olig2cre;MaptnLacZ #1	0.082
			Olig2cre;MaptnLacZ #2	0.069
			Olig2cre;MaptnLacZ #3	0.078
			Olig2cre;MaptnLacZ #4	0.086
	Mean			0.07875
	Std. Deviation			0.007274
	Std. Error of Mean			0.003637
