# Supplementary material for: Olig3 regulates early cerebellar development
Source: eLife. 2021 Feb 16;10:e64684. doi: 10.7554/eLife.64684 (PMC7886330; doi:10.7554/eLife.64684)
Supplement: Figure 6—source data 1. [file elife-64684-fig6-data1.xlsx]

## Sheet: 6B
					cells/section
					E10.5	E11.5	E12.5	E13.5	E14.5
			WT 1	Olig3-/Olig2+/Foxp2-	0	166.7	221.1	58.4	0
			WT 2	Olig3-/Olig2+/Foxp2-	0	165	189.1	51.1	0
			WT 3	Olig3-/Olig2+/Foxp2-	0	171.1	189.4	50.9	0
			WT 4	Olig3-/Olig2+/Foxp2-	0	152.2	196.3	52.3	0
	Mean				0	163.8	199	53.18	0
	Std. Deviation				0	8.118	15.12	3.538	0
	Std. Error of Mean				0	4.059	7.56	1.769	0
					E10.5	E11.5	E12.5	E13.5	E14.5
			WT 1	Olig3+/Olig2+/Foxp2-	0	84.1	292	68.4	4.1
			WT 2	Olig3+/Olig2+/Foxp2-	0	74.9	281.7	62.1	5.1
			WT 3	Olig3+/Olig2+/Foxp2-	0	78.9	279.2	66.5	3.8
			WT 4	Olig3+/Olig2+/Foxp2-	0	80.1	281.4	66.1	6.1
	Mean				0	79.5	283.6	65.78	4.775
	Std. Deviation				0	3.788	5.726	2.647	1.044
	Std. Error of Mean				0	1.894	2.863	1.324	0.5218
					E10.5	E11.5	E12.5	E13.5	E14.5
			WT 1	Olig3+/Olig2-/Foxp2+	0	86.3	192.7	84.1	10.1
			WT 2	Olig3+/Olig2-/Foxp2+	0	88.1	176.5	74.3	6.8
			WT 3	Olig3+/Olig2-/Foxp2+	0	78.4	187.1	82.1	7.9
			WT 4	Olig3+/Olig2-/Foxp2+	0	80.6	178.9	80.2	8.6
	Mean				0	83.35	183.8	80.18	8.35
	Std. Deviation				0	4.595	7.47	4.228	1.382
	Std. Error of Mean				0	2.297	3.735	2.114	0.691

## Sheet: 6C
				Olig2+ cells/section
				Control	Olig3 KO
				Control	Olig3 KO
			Mouse 1	586.2	589.4
			Mouse 2	558.1	544.5
			Mouse 3	569.3	586.6
	Mean			571.2	573.5
	Std. Deviation			14.15	25.15
	Std. Error of Mean			8.167	14.52

## Sheet: 6D
				Olig3+ cells/section
				Control	Olig2 KO
				Control	Olig3 KO
			Mouse 1	358.4	341.1
			Mouse 2	389.6	384
			Mouse 3	367.1	369.4
	Mean			371.7	364.8
	Std. Deviation			16.1	21.81
	Std. Error of Mean			9.296	12.59

## Sheet: 6F
			Proportion (Foxp2+/Pax2+)/Foxp2+
			Control	Olig2 KO	Olig3 KO
			0.026	0.3	0.54
			0.043	0.32	0.51
			0.038	0.34	0.56
			0.045	0.33	0.54
			0.032
			0.041
	Mean		0.0375	0.3225	0.5375
	Std. Deviation		0.007232	0.01708	0.02062
	Std. Error of Mean		0.002952	0.008539	0.01031
